# Supplementary material
Source: Research Square preprint supplement (doi:10.21203/rs.3.rs-9432897/v1)
Supplement: Supplementary file 1 [file eb527840a2cd6d69a3227a5a.docx]

**
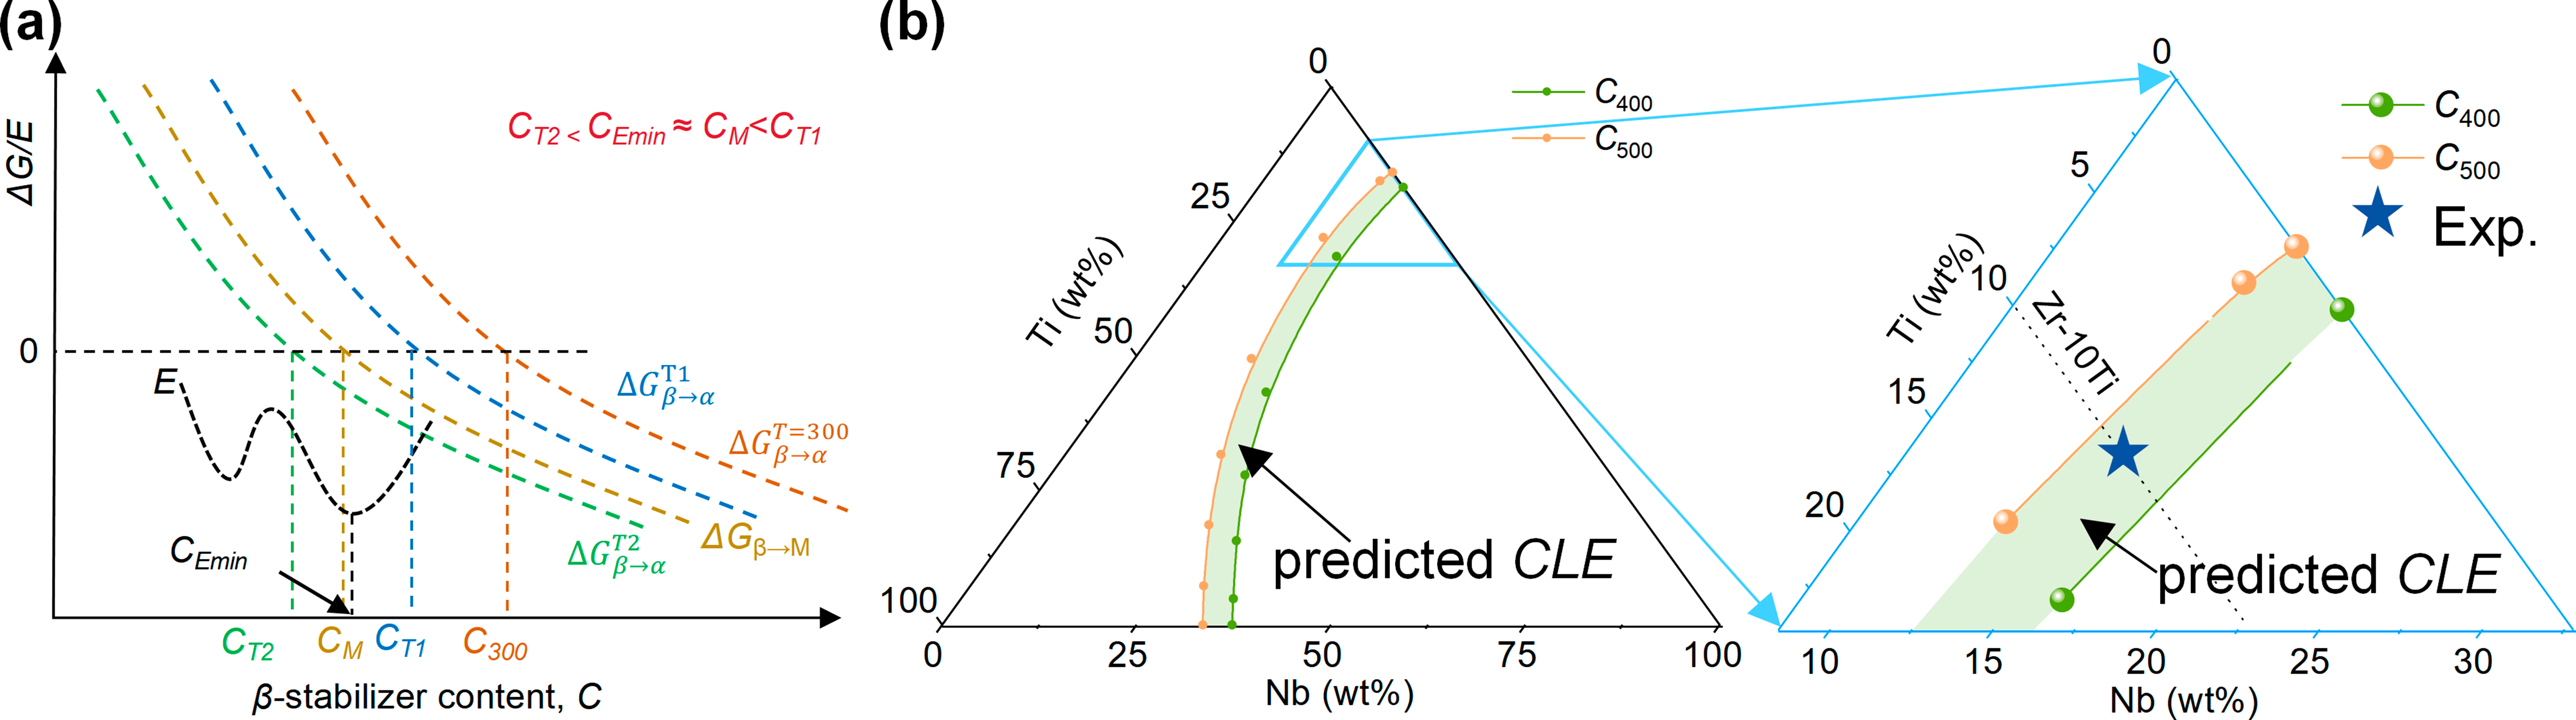
**

**Extended Data Fig. 1** **| Schematic diagram of the correlation. (a)** Difference in Gibbs free energy between *α* and *β* phases (Δ*Gβ-α*) at various temperatures (*T* = 300 K, *T1*, *TM*, and *T2*, respectively) or Young’s modulus (*E)* as a function of β stabilizer content (*C)*. **(b)** Calculated *ΔGβ-α* of the Zr-Ti-Nb system at temperatures of 300, 400, and 500 K, predicted composition window for low-modulus (Predicted *CLE*), and the location of the selected Zr-10Ti-15Nb composition (Exp.).

**
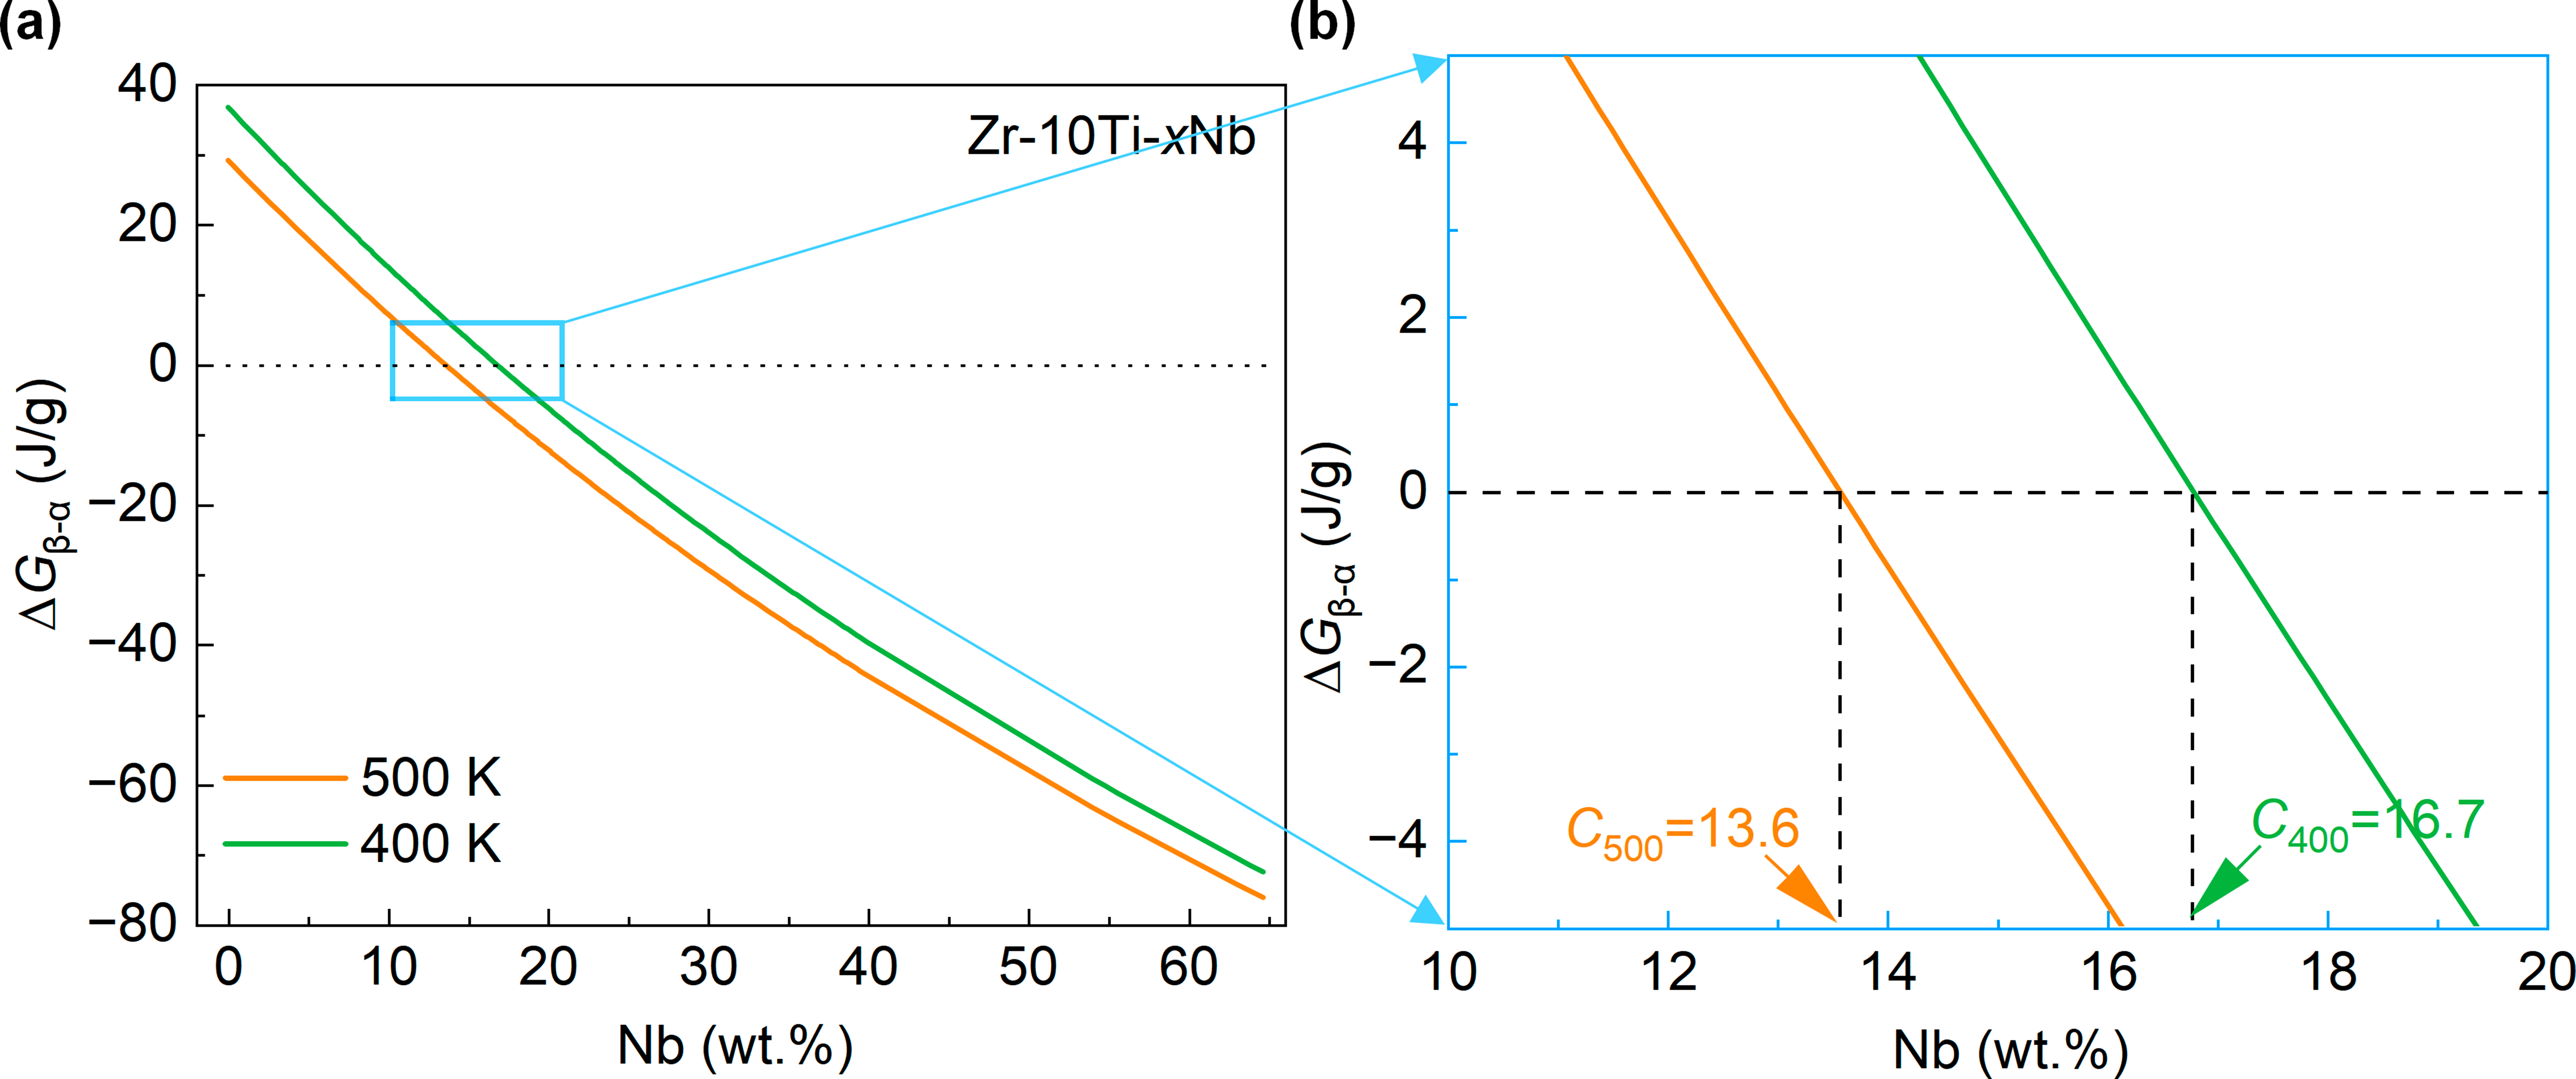
**

**Extended Data Fig. 2 | Determination of the experimental composition of Zr-10Ti-*x*Nb. (a)** at temperatures of 400 and 500 K. **(b)** Enlarged view of the box region in **a.**

**
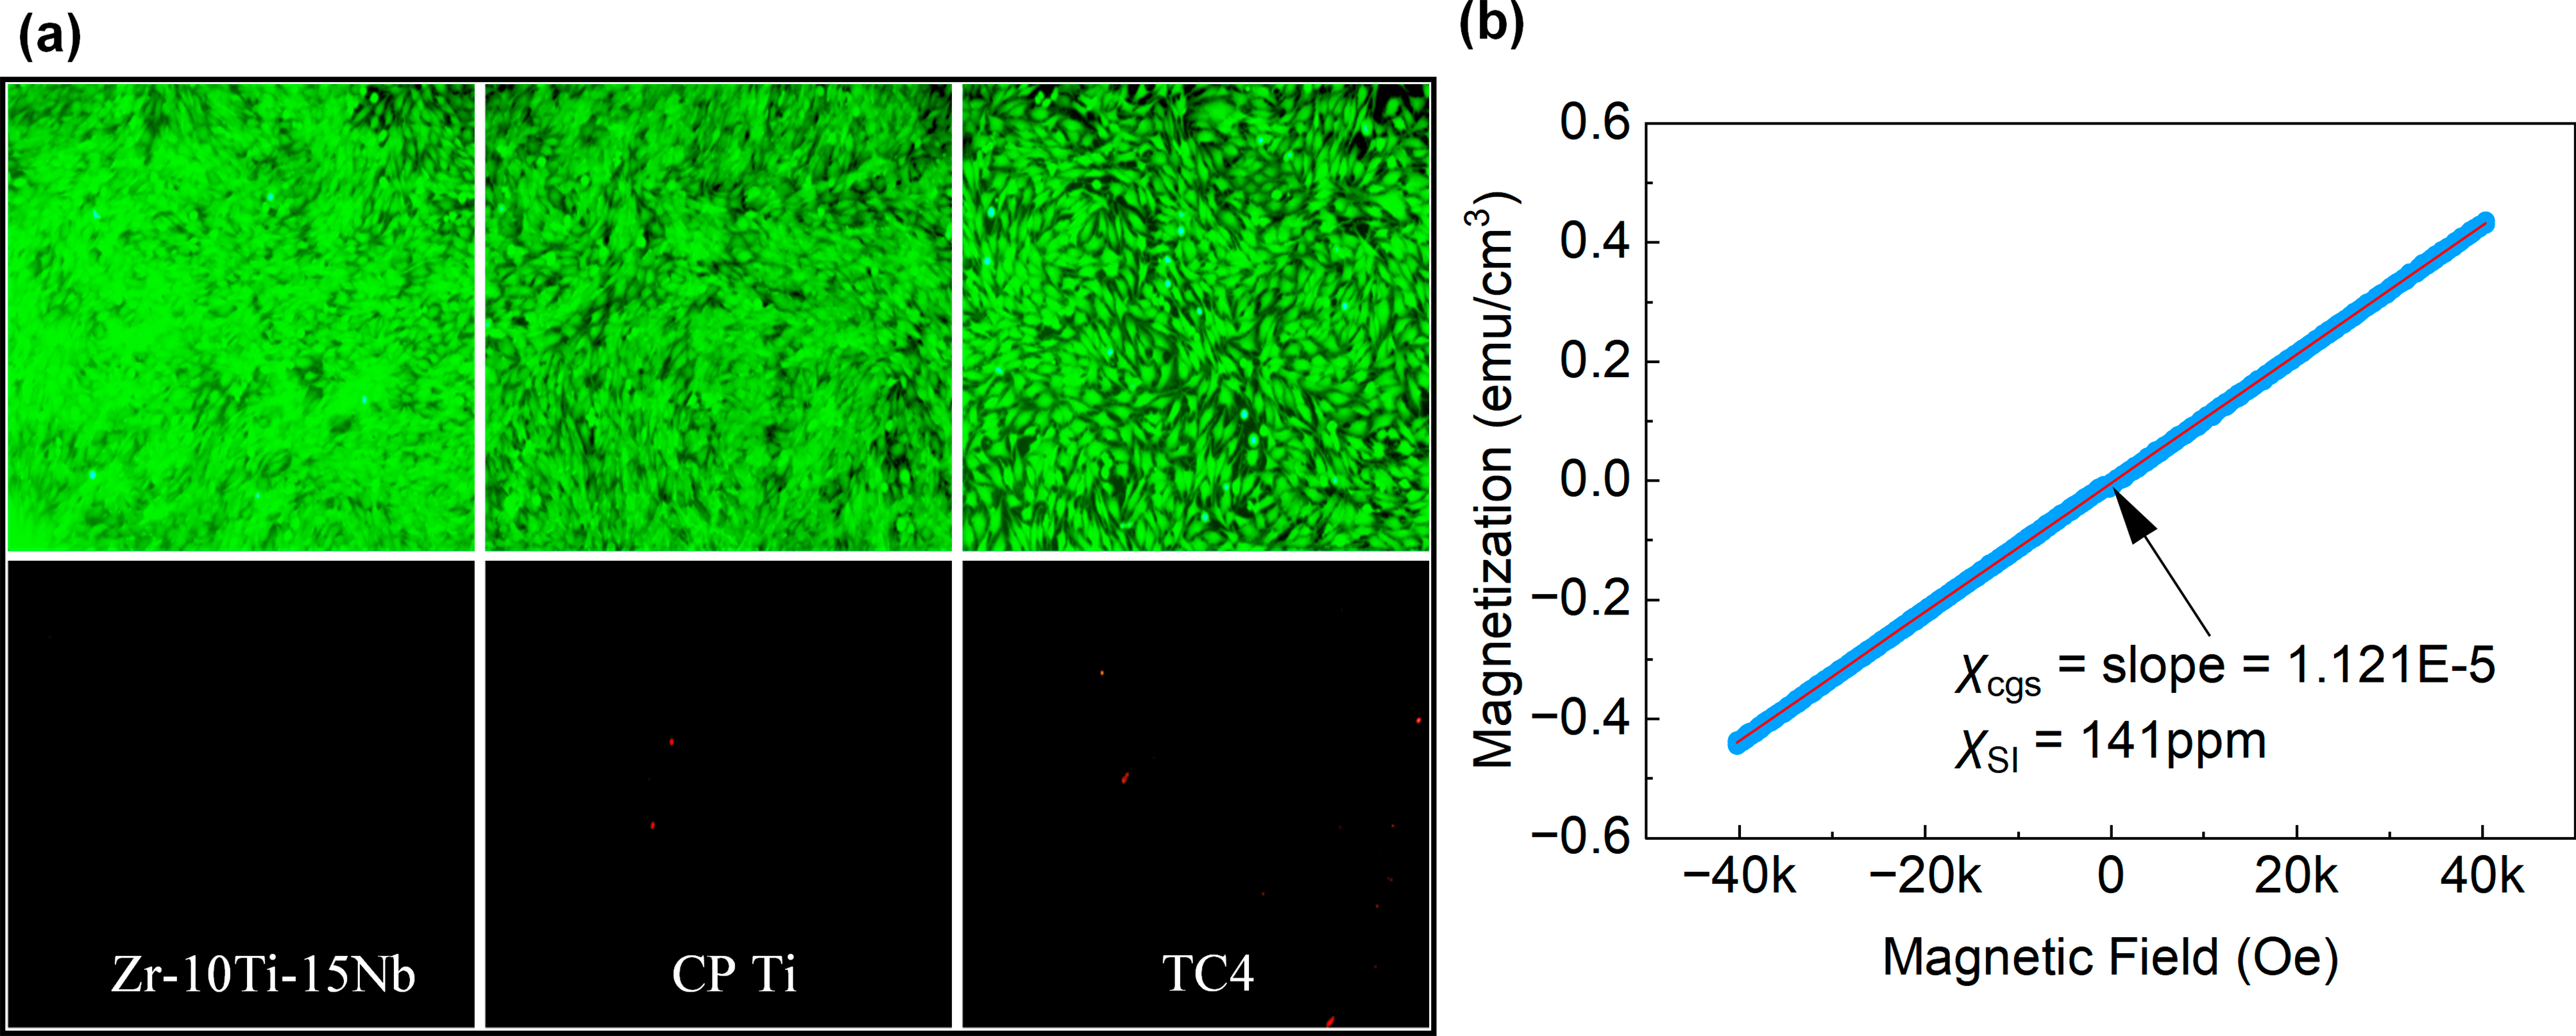
**

**Extended Data Fig. 3 | Biological performance of Zr-10Ti-15Nb. (a)** Live/dead cell fluorescence staining analysis. **(b)** Magnetization versus magnetic field curve.

**
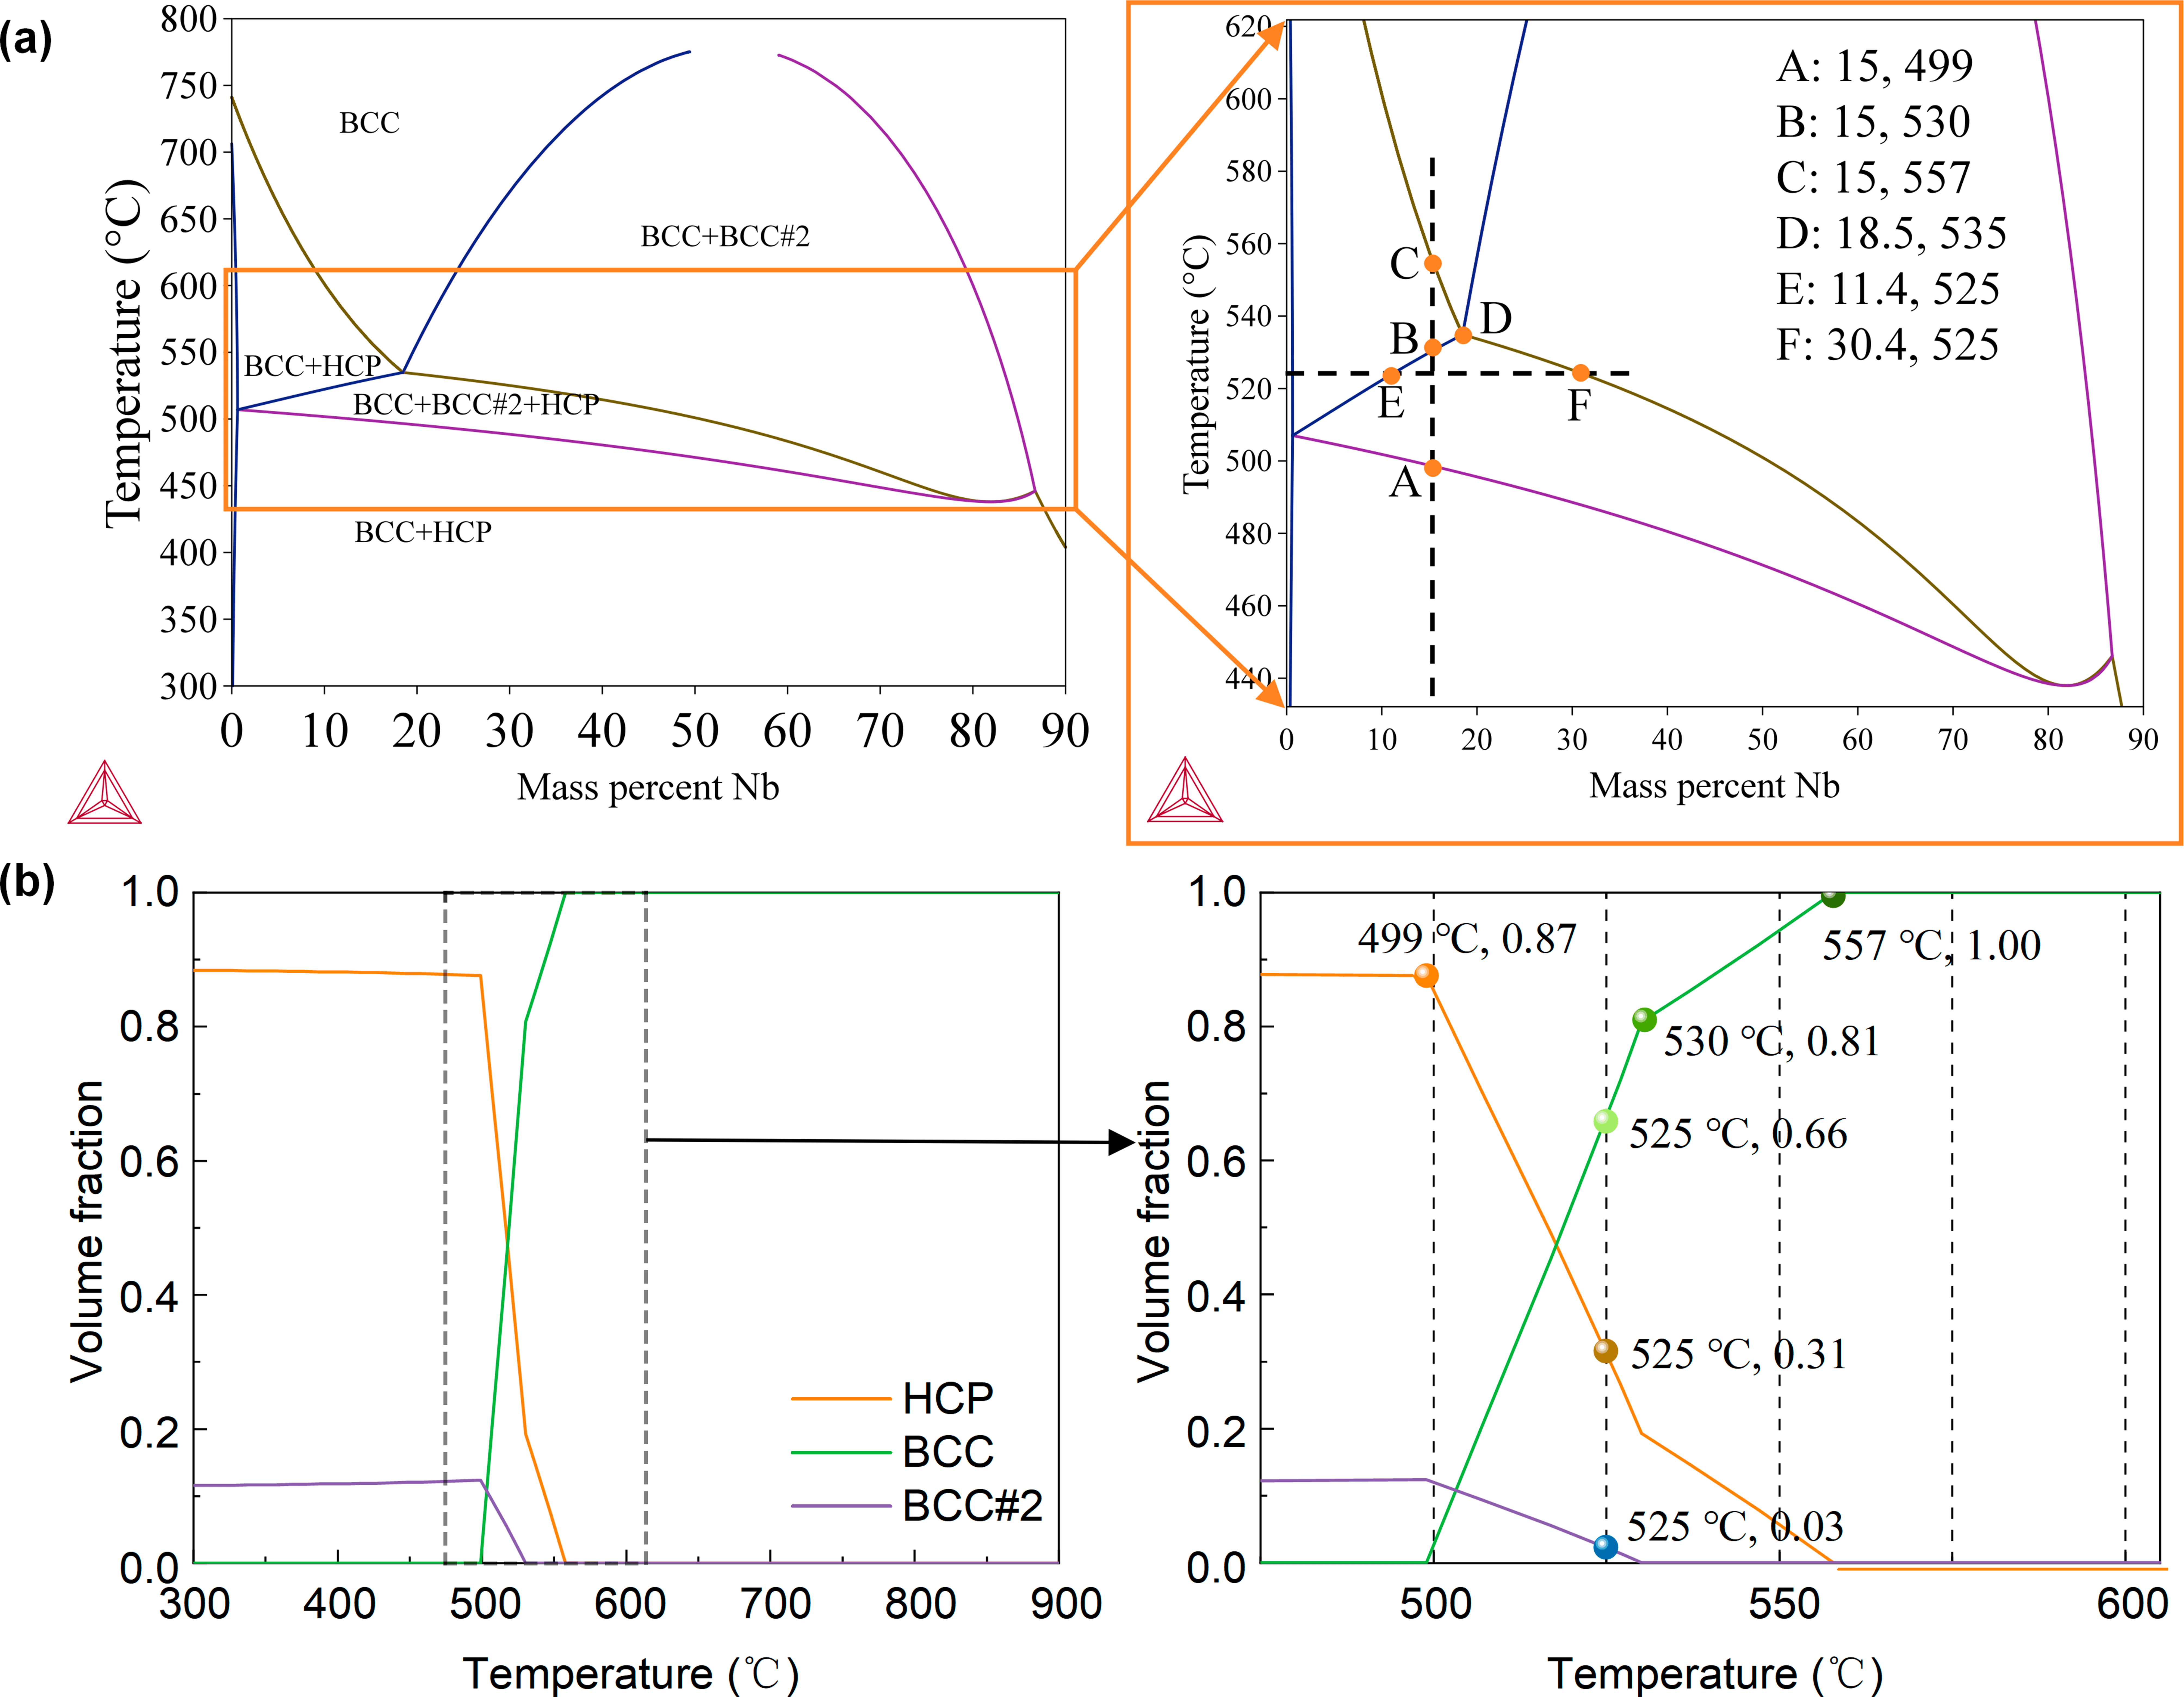
**

**Extended Data Fig. 4 | Calculated results for** **Zr-10Ti-*x*Nb. (a)** Pseudo-binary phase diagram. (**b)** Phase constitution of the Zr-10Ti-15Nb alloy as a function of temperature.

**
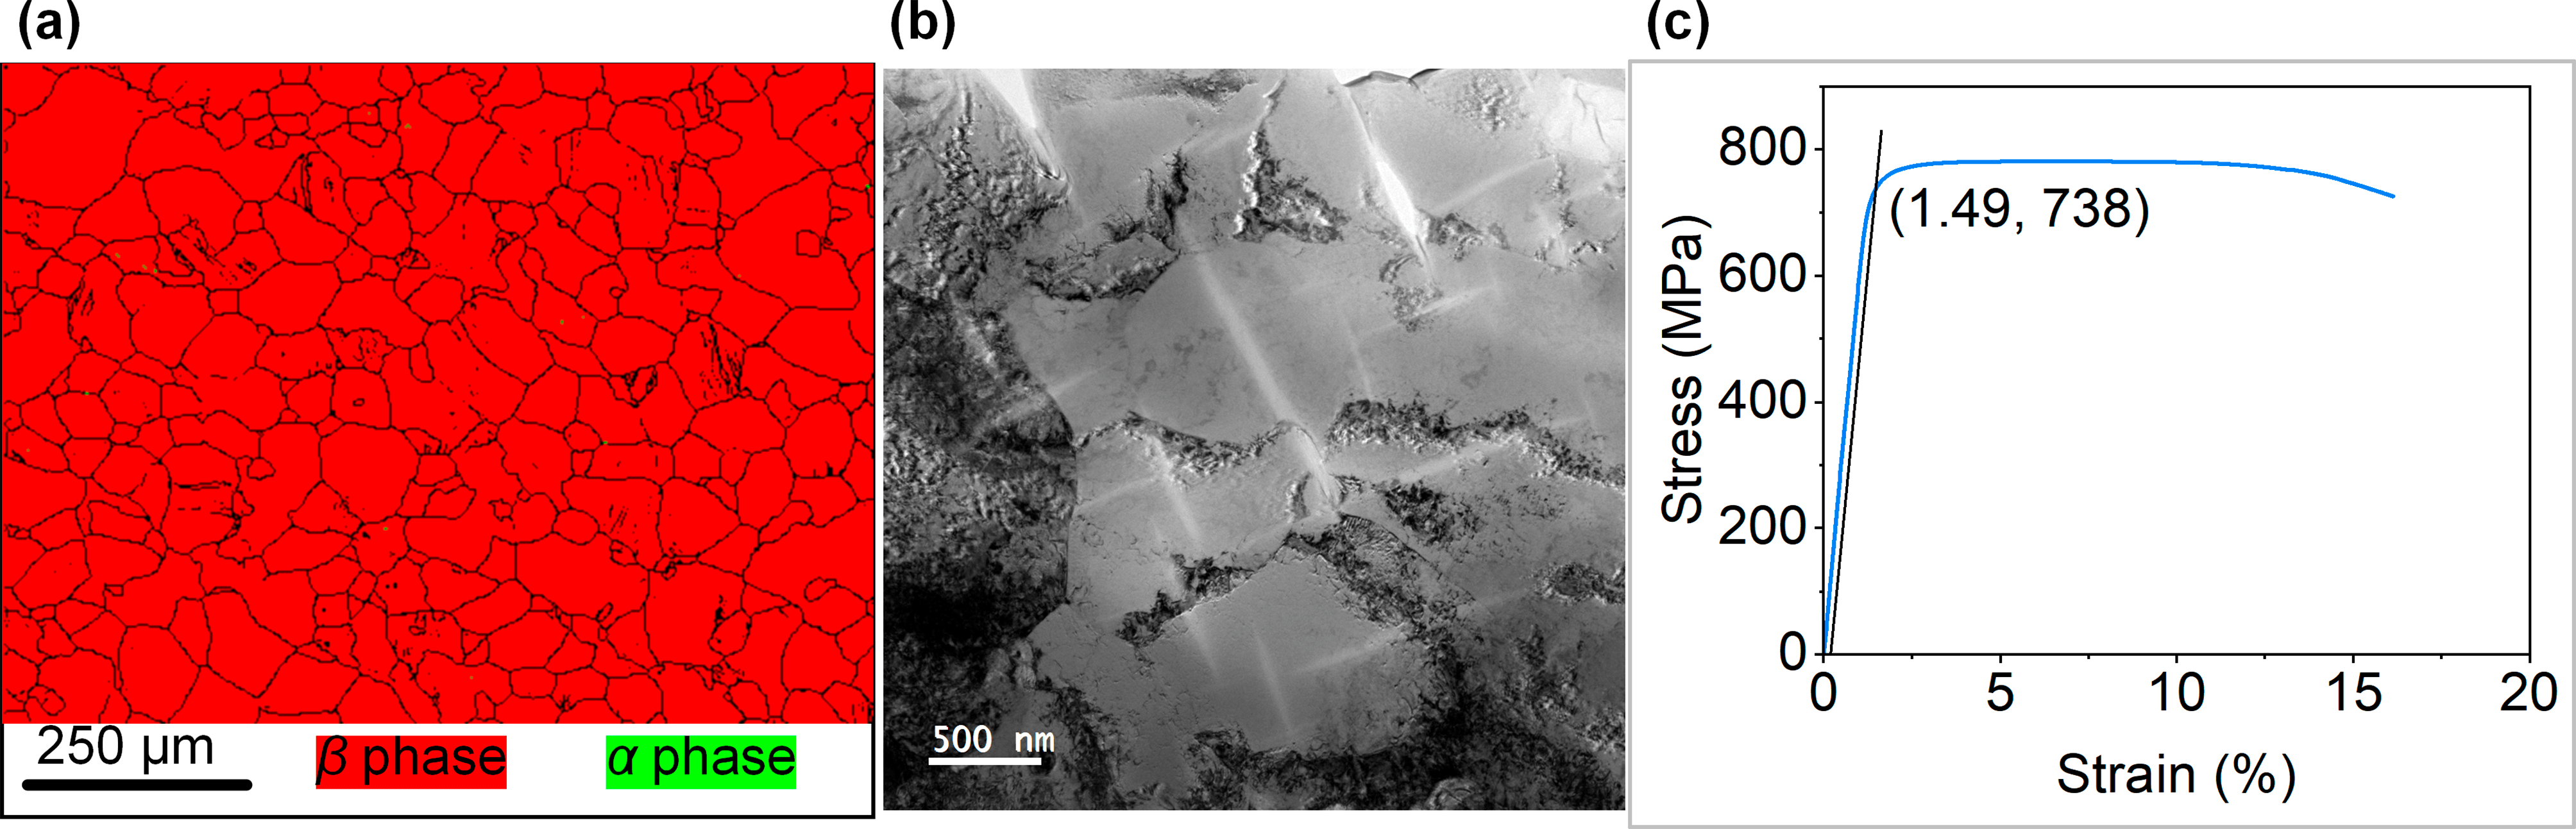
**

**Extended Data Fig. 5 | Results for Zr-10Ti-15Nb after rolling at 600 °C. (a)** EBSD image. **(b)** TEM bright field image. **(c)** Representativestress–strain curve.

**
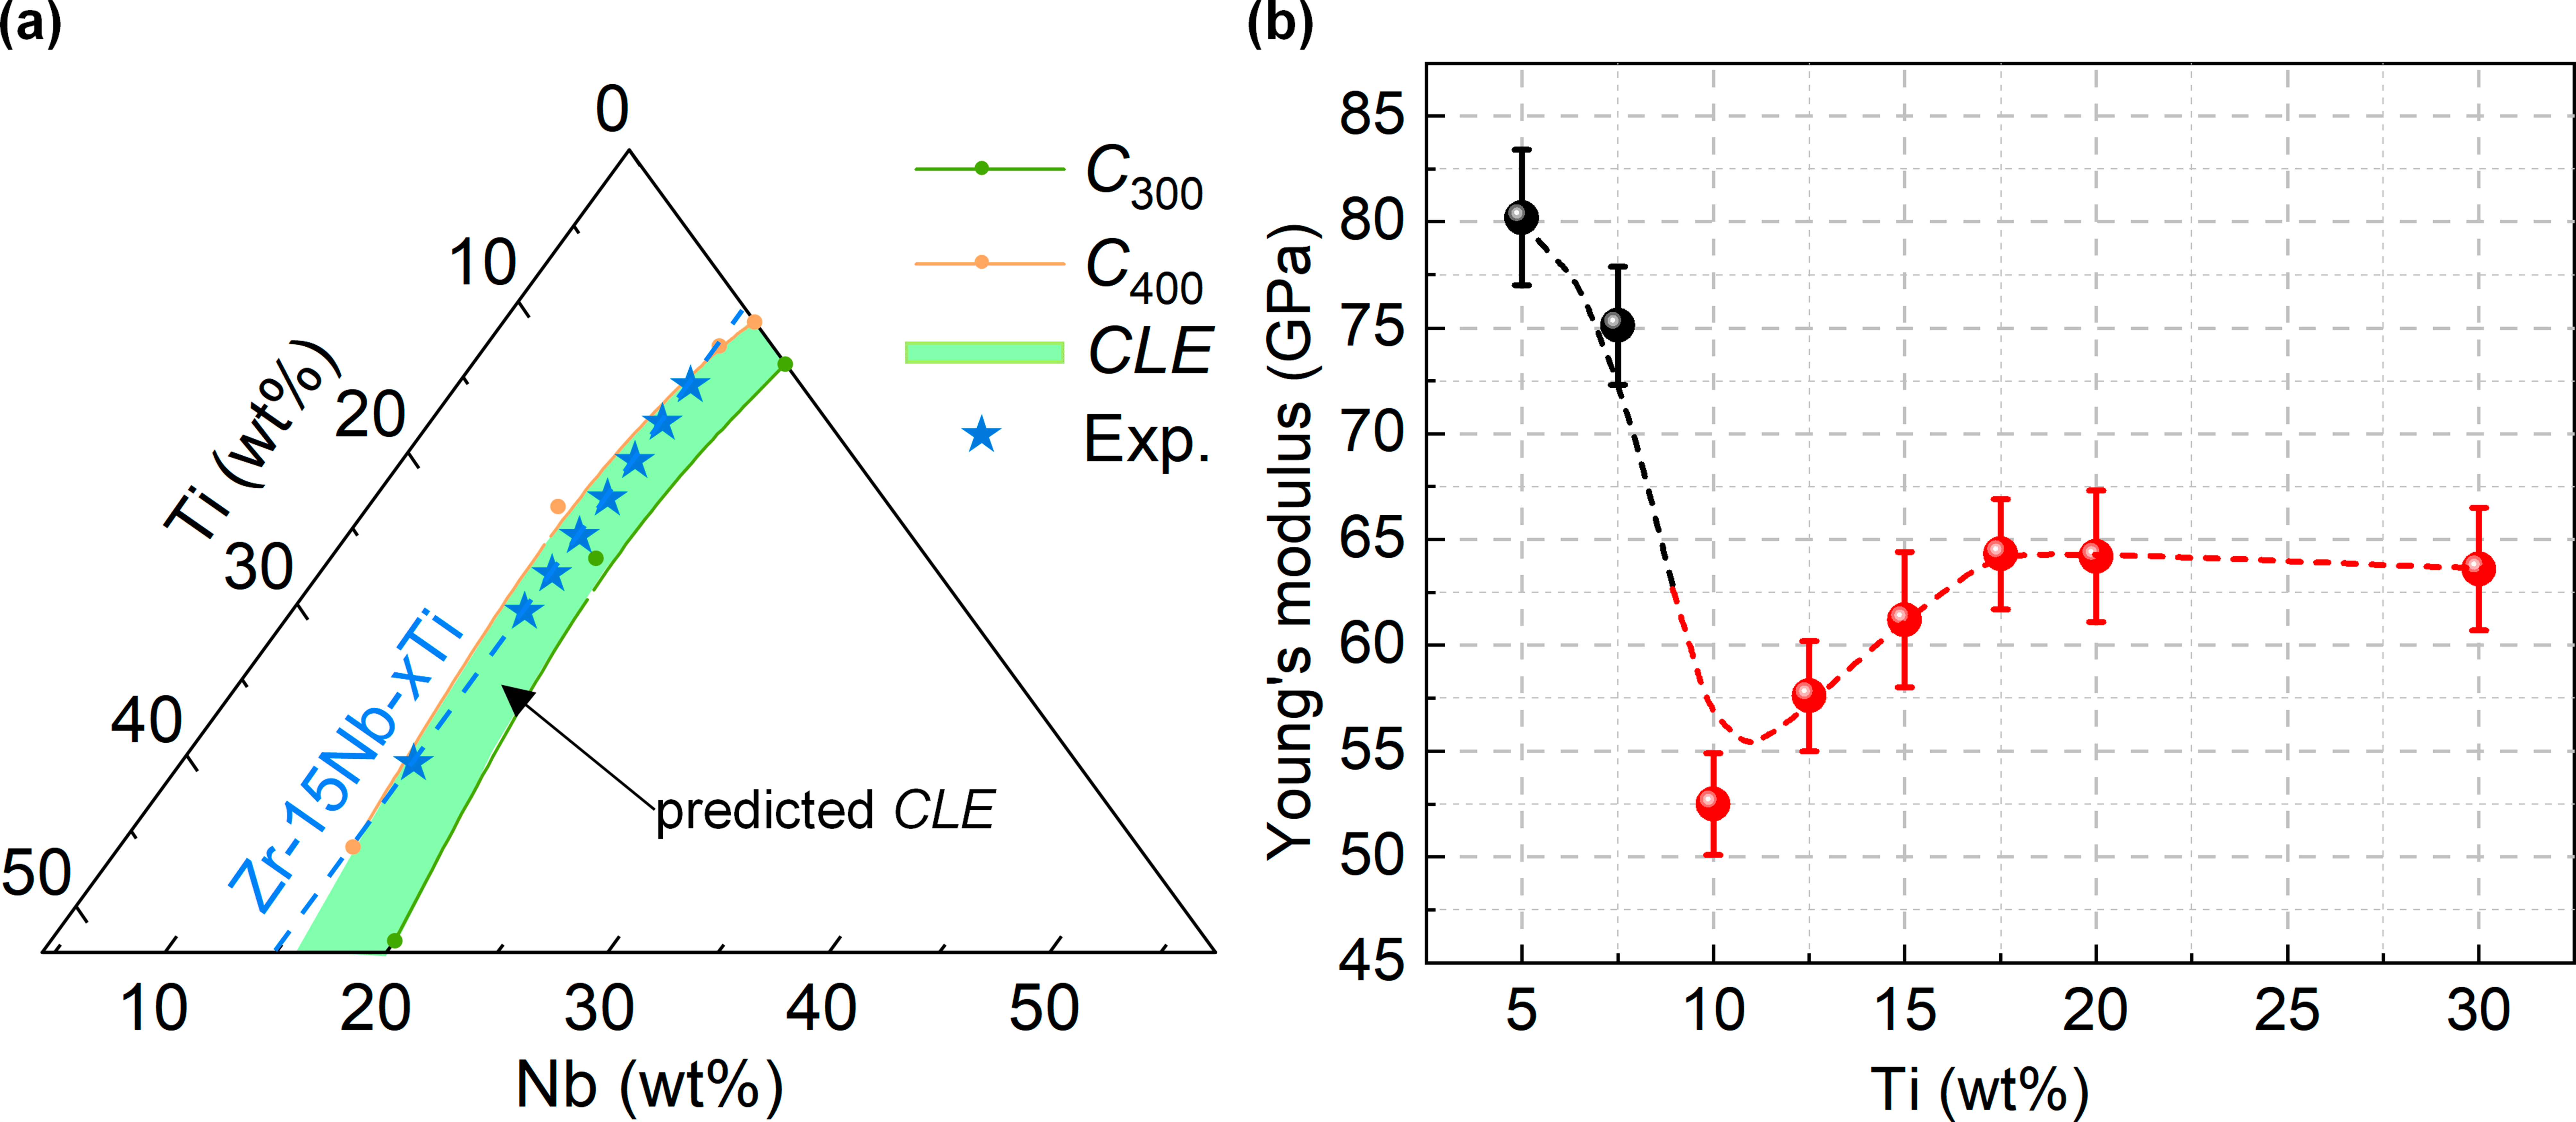
**

**Extended Data Fig. 6 | Verification of the generality of the proposed strategy. (a)** Selected experimental composition points (Exp.) located near or within the predicted low-modulus composition region, *CLE,* of the Zr-Ti-Nb system. (**b)** Young’s modulus as a function of Ti content of selected compositions.
